# Supplementary material for: How Are We Educating Future Physicians and Pharmacists in Pakistan? A Survey of the Medical and Pharmacy Student’s Perception on Learning and Preparedness to Assume Future Roles in Antibiotic Use and Resistance
Source: MDPI journal article supplement (doi:10.3390/antibiotics10101204), 2021-10-03
Supplement: s1 [file s1]

# Supplementary S1

**a)** Demographics of respondents. (Table S1)

**b)** How well do you feel that your medical/ pharmacy education has prepared you to do the following upon graduation? (Table S2)

## a) (Table S1)

Table S1. Demographics of respondents.

|                                | Medical Colleges<br>n (%) |            |            | Pharmacy Colleges<br>n (%) |            |            |
|--------------------------------|---------------------------|------------|------------|----------------------------|------------|------------|
|                                | Public                    | Private    | Total      | Public                     | Private    | Total      |
| <b>Institutes participated</b> | 10 (38.5)                 | 16 (61.5)  | 26 (57.8)  | 8 (42.1)                   | 11 (57.9)  | 19 (42.2)  |
| <b>Institutes Excluded</b>     | -                         | -          | 4          | -                          | -          | 20         |
| <b>Response rate</b>           | -                         | -          | 76.5%      | -                          | -          | 70.4%      |
| <b>Respondents</b>             | 175 (33.3)                | 351 (66.7) | 526 (55.5) | 193 (45.7)                 | 229 (54.3) | 422 (44.5) |
| <b>Male</b>                    | 94 (53.7)                 | 152 (43.3) | 246 (46.8) | 70 (36.3)                  | 86 (37.6)  | 156 (37.0) |
| <b>Female</b>                  | 81 (46.3)                 | 199 (56.7) | 280 (53.2) | 123 (63.7)                 | 143 (62.4) | 266 (63.0) |
| <b>Complete rotation</b>       | 88 (50.3)                 | 212 (60.4) | 300 (57.0) | 53 (27.5)                  | 48 (21.0)  | 101 (23.9) |

n= number, %= percentage.

## b) (Table S2)

**Table S2.** How well do you feel that your medical/ pharmacy education has prepared you to do the following upon graduation?

| Institute                        | Compared with | Institutes                | Mean Difference | p-value |
|----------------------------------|---------------|---------------------------|-----------------|---------|
| <i>Medical Colleges Public</i>   |               | Medical Colleges Private  | 0.148           | 0.020*  |
|                                  |               | Pharmacy Colleges Public  | 0.020           | 0.783   |
|                                  |               | Pharmacy Colleges Private | 0.047           | 0.496   |
| <i>Medical Colleges Private</i>  |               | Medical Colleges Public   | -0.148          | 0.020*  |
|                                  |               | Pharmacy Colleges Public  | -0.128          | 0.037*  |
|                                  |               | Pharmacy Colleges Private | -0.101          | 0.082   |
| <i>Pharmacy Colleges Public</i>  |               | Medical Colleges Public   | -0.020          | 0.783   |
|                                  |               | Medical Colleges Private  | 0.128           | 0.037*  |
|                                  |               | Pharmacy Colleges Private | 0.027           | 0.685   |
| <i>Pharmacy Colleges Private</i> |               | Medical Colleges Public   | -0.047          | 0.496   |
|                                  |               | Medical Colleges Private  | 0.101           | 0.082   |
|                                  |               | Pharmacy Colleges Public  | -0.027          | 0.685   |

\*p≤ 0.05 (significant difference between groups using One-way ANOVA.
